# Supplementary material
Source: PubMed Central journal article supplement (PMC7351287)
Supplement: NIHMS1593875-supplement-2.pdf [file NIHMS1593875-supplement-2.pdf]

## Supplementary Materials:

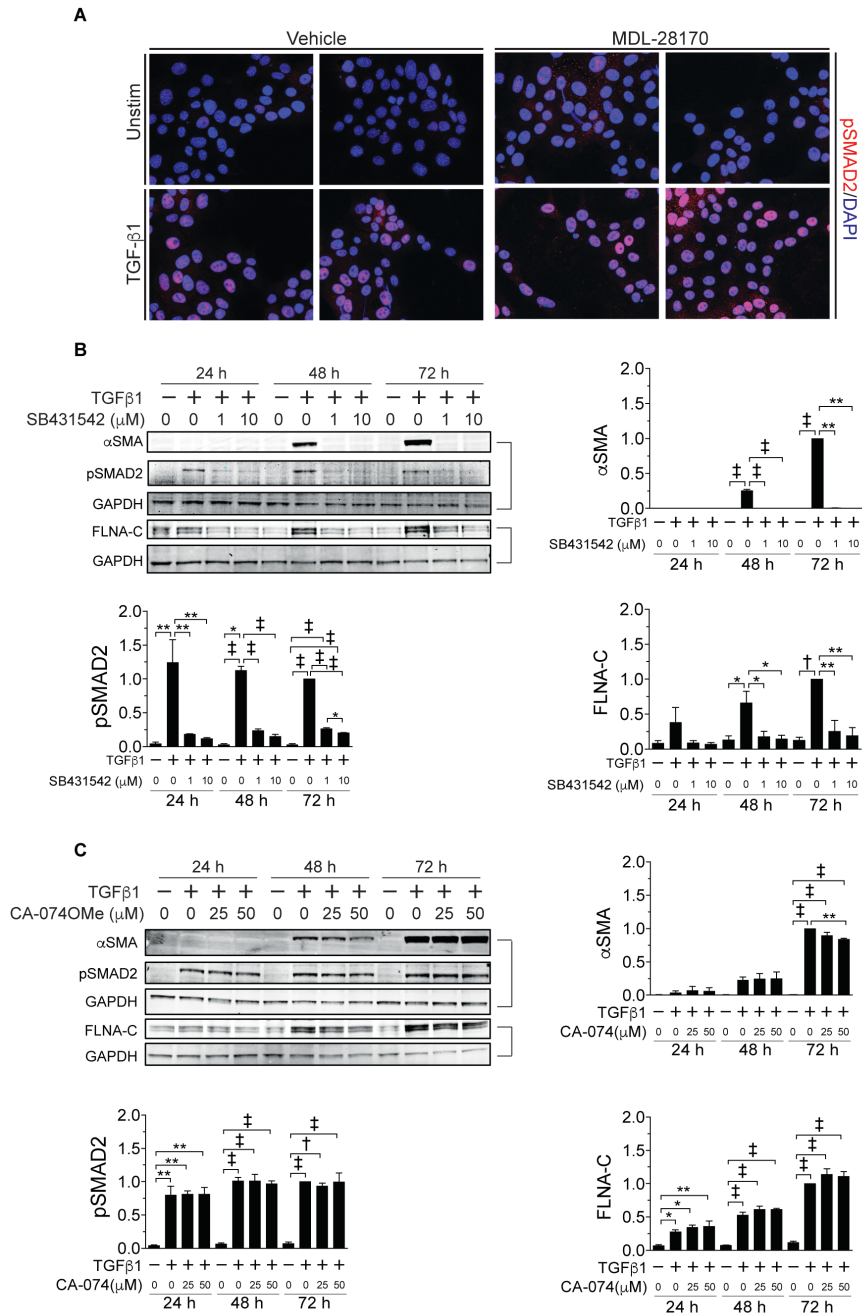

**Supplementary Fig. 1. TGFβ stimulation induced pSMAD2 nuclear localization, Alk5**

inhibition prevented EMT, and cathepsin B and L inhibition did not alter EMT. (A)

Representative pSMAD2 (red) IF of NMuMG cells with and without TGFβ stimulation

(10 ng/mL) and MDL-28170 treatment (20  $\mu$ M). **(B)** Representative immunoblots (bracket indicates identical gel) and quantification ( $n = 3$ , normalized to GAPDH) for the indicated proteins, time points after TGF $\beta$  stimulation, and concentrations of SB431542. **(C)** Representative immunoblots (bracket indicates identical gel) and quantification ( $n = 3$ , normalized to GAPDH) for the indicated proteins, time points after TGF $\beta$  stimulation, and concentrations of CA-074-OMe. Data are expressed as mean  $\pm$  s.e.m. \* $P < 0.05$ , \*\* $P < 0.01$ , † $P < 0.005$ , ‡ $P < 0.001$  by one-way ANOVA with Tukey's *post hoc* test.

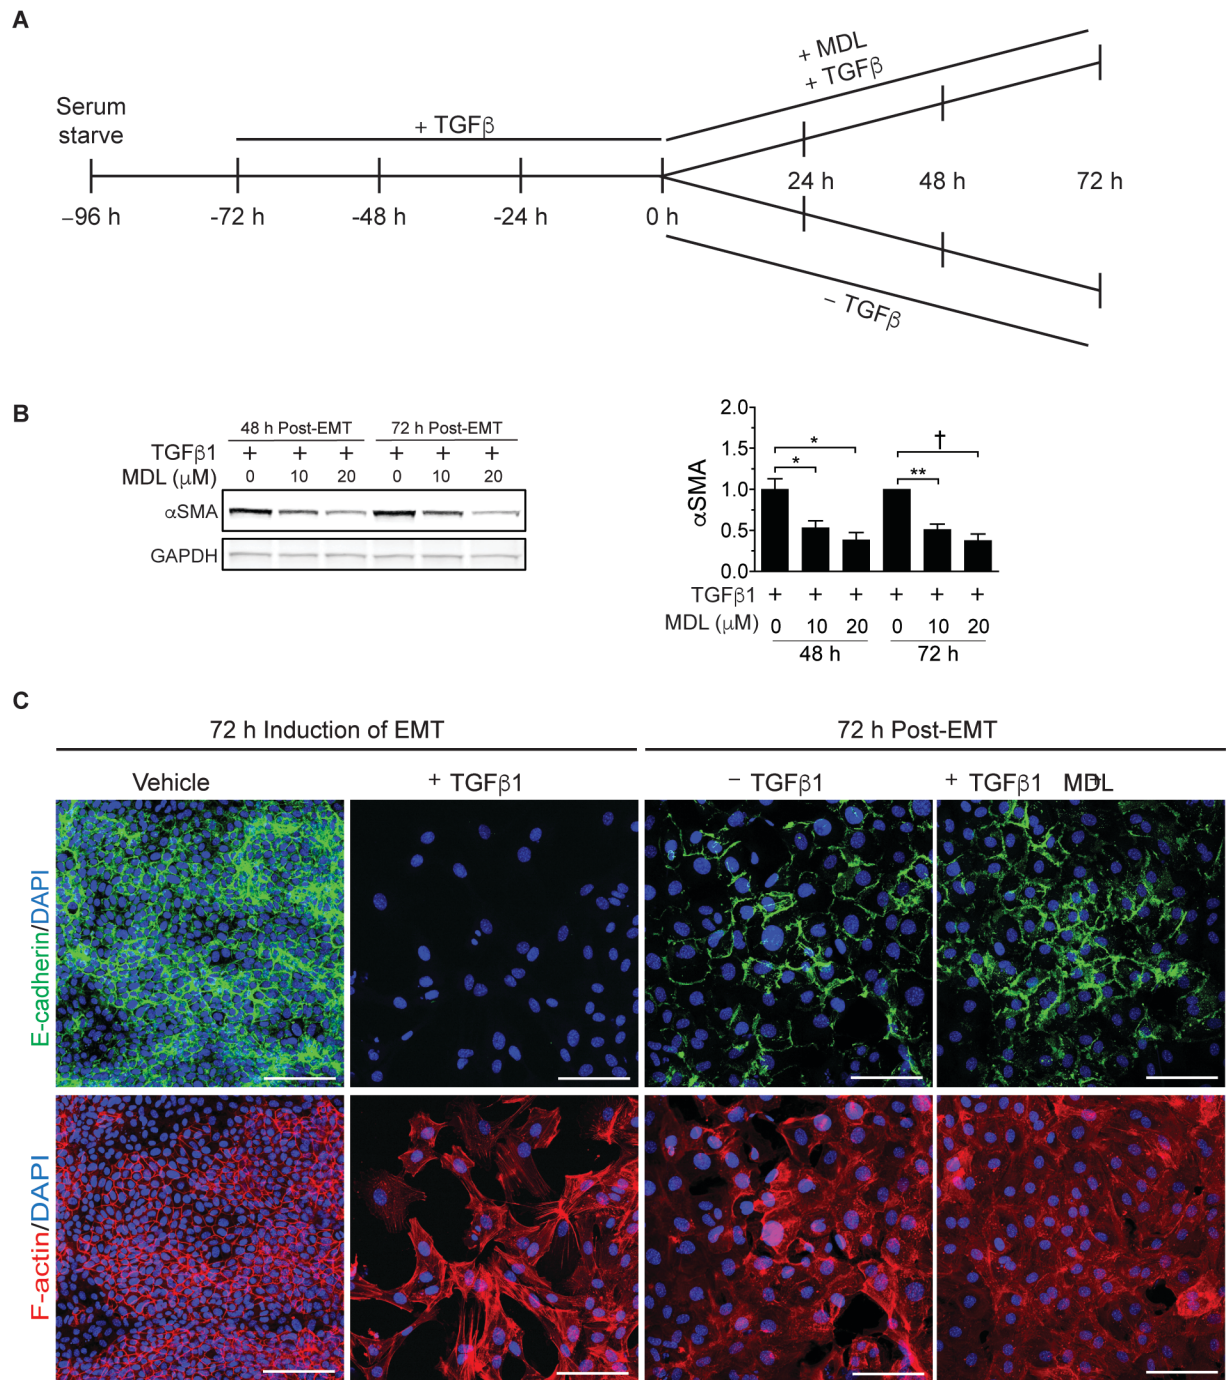

**Supplementary Fig. 2.** Broad spectrum calpain inhibition induced mesenchymal-to-epithelial transition (MET) in NMuMG cells. (A) Serum starved NMuMG cells were maintained in TGF $\beta$  for 72 h then the calpain inhibitor MDL-28170 was added for an additional 48 or 72 h with continued TGF $\beta$  exposure. (B) Representative immunoblot for  $\alpha$ SMA

following the induction of mesenchymal transition with indicated concentrations of MDL-28170 (left), and (right) quantification normalized to GAPDH ( $n = 3$ ). (C) Representative IF of MET in NMuMG stained for E-cadherin (green), F-actin (red), and DAPI (blue) Scale bar: 100  $\mu\text{m}$ . Data are expressed as mean  $\pm$  s.e.m.  $*P < 0.05$ ,  $**P < 0.01$ ,  $\dagger P < 0.005$ ,  $\ddagger P < 0.001$  by one-way ANOVA with Tukey's *post hoc* test.

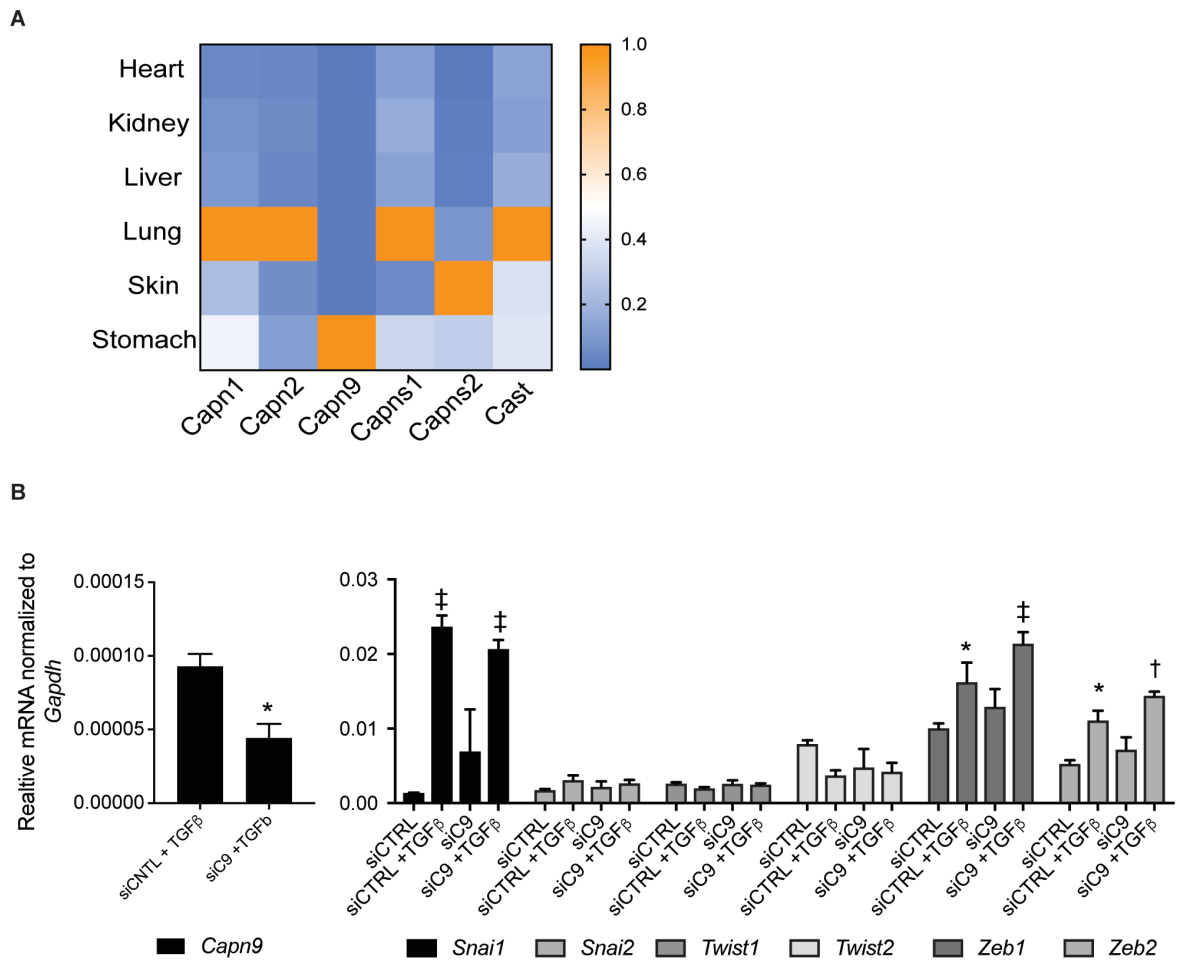

**Supplementary Fig. 3.** Expression of dimeric calpain message in mouse tissue and expression of EMT transcription factors in NMuMG cells. (A) Heat map of gene expression of dimeric calpains in mouse tissues normalized to *Gapdh* ( $n = 3$ ). For each gene, expression is normalized to 1 in the highest expressing tissue. (B) Expression of *Capn9* mRNA (left)

and EMT transcription factors (right) in NMuMG cells 24 h after stimulation with TGF $\beta$  and siRNA knockdown of *Capn9* (siC9 +TGF $\beta$ ) compared to controls. For each EMT transcription factor (right), statistically significant comparisons are made to unstimulated cells without knockdown (siCTRL). Data are expressed as mean  $\pm$  s.e.m. \* $P$  < 0.05, \*\* $P$  < 0.01, † $P$  < 0.005, ‡ $P$  < 0.001 by student's t-test (right) and two-way ANOVA with Dunnett's *post hoc* test.

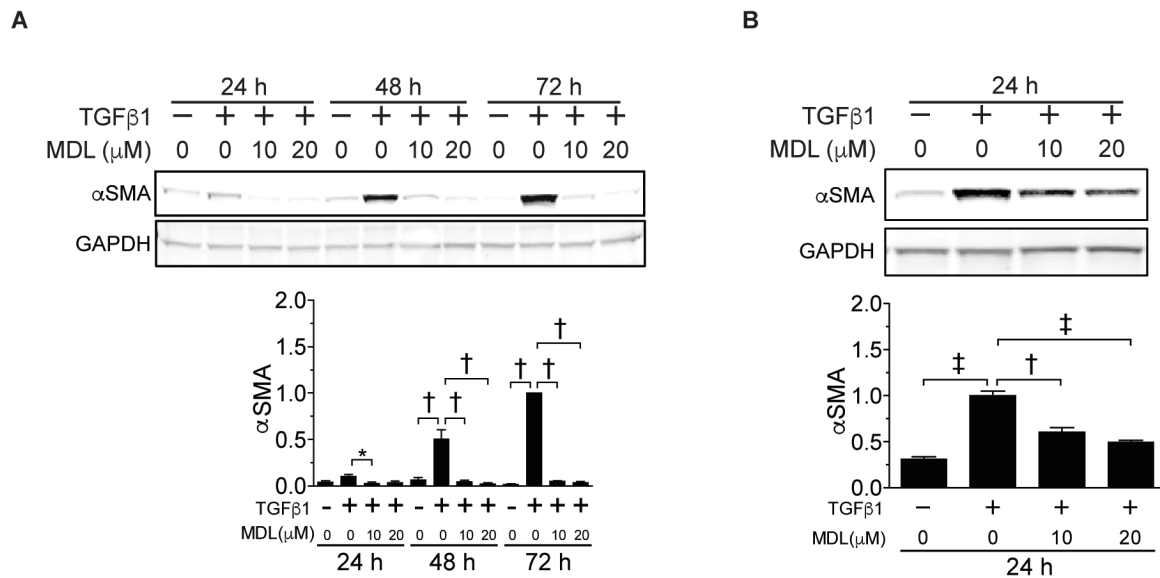

**Supplementary Fig. 4.** Calpain inhibition suppressed mesenchymal transition in multiple cell types. **(A)** Representative immunoblot blot and quantification of  $\alpha$ SMA in serum starved, TGF $\beta$ 1-stimulated MDCK ( $n = 4$ ) at indicated time points with or without calpain inhibition, and **(B)** representative immunoblots and quantification of  $\alpha$ SMA in serum starved, TGF $\beta$ 1-stimulated primary NHLF ( $n = 3$ ) at 24 h with calpain inhibition. Data are expressed as mean  $\pm$  s.e.m. \* $P$  < 0.05, \*\* $P$  < 0.01, † $P$  < 0.005, ‡ $P$  < 0.001 by one-way ANOVA with Tukey's *post hoc* test.

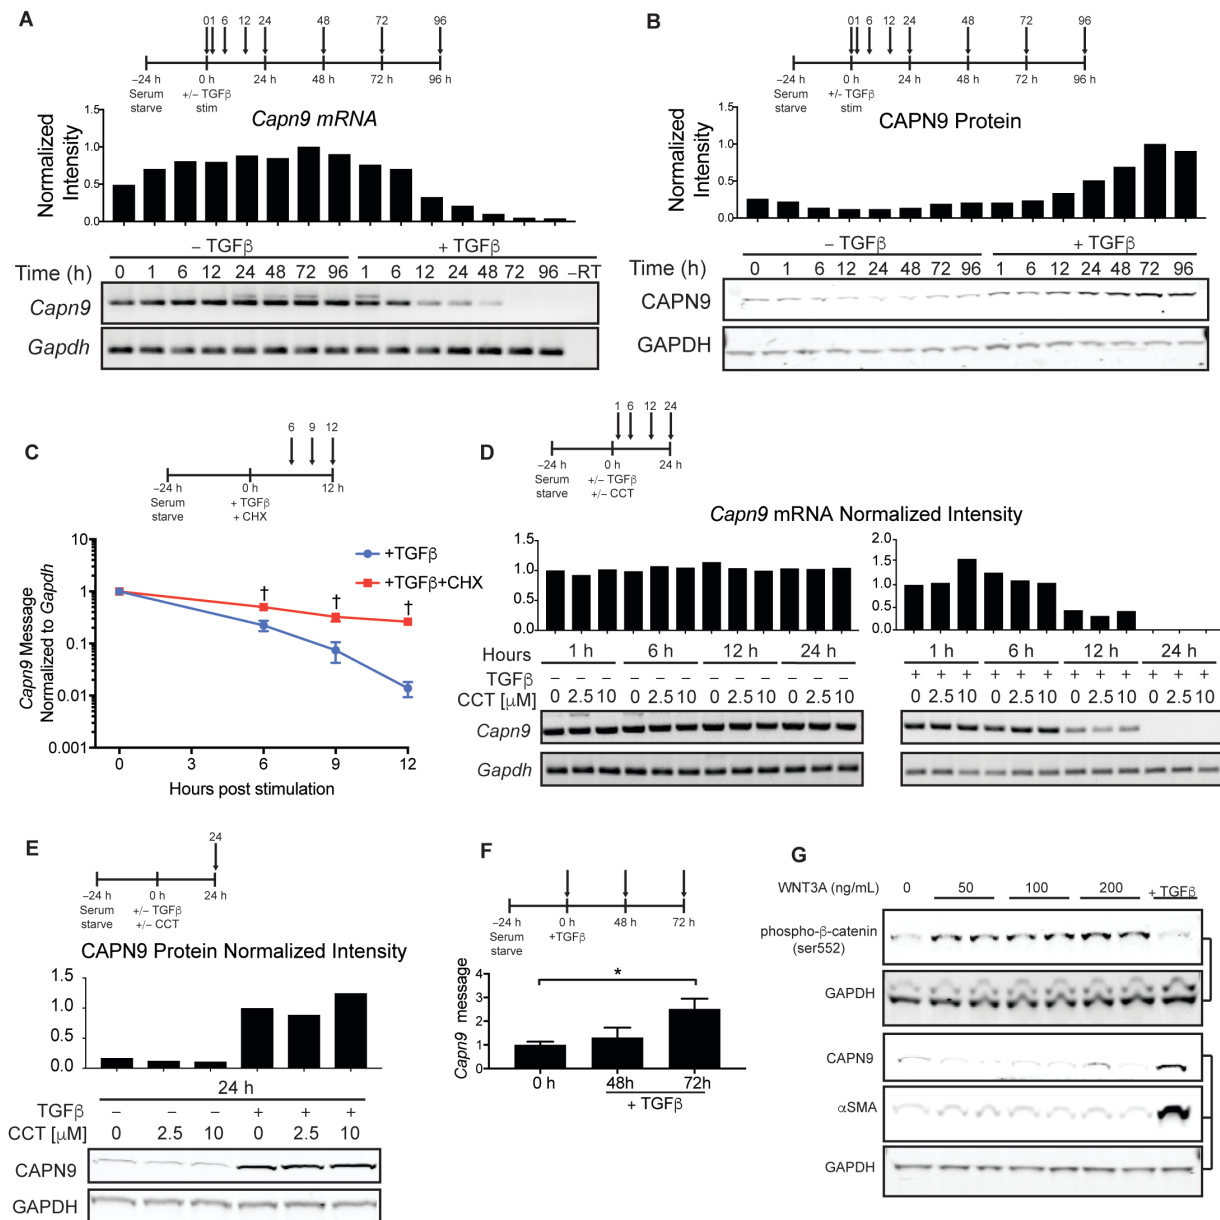

**Supplementary Fig. 5.** TGFβ induced expression of CAPN9 protein with coordinated translation-dependent mRNA decay in NMuMG cells. (A) Time course of the experiment with arrows indicating points at which samples were collected. Amplified cDNA of *Capn9* message normalized to *Gapdh* at 24 h of starvation (time point 0 h) and at

indicated time points during continued starvation ( $-TGF\beta$ ) or with stimulation ( $+TGF\beta$ ). No reverse transcriptase control indicated by “-RT”. **(B)** Protein quantities of CAPN9 normalized to GAPDH with serum starvation (0 h), and in the setting of  $TGF\beta$  stimulation. **(C)** Following starvation, NMuMG cells were stimulated with  $TGF\beta$  and translation was inhibited with cycloheximide (CHX, 5  $\mu\text{g}/\text{mL}$ ). *Capn9* message at 6, 9, and 12 h after treatment was quantified by RT-qPCR and normalized to *Gapdh*.  $\dagger P < 0.005$  by two-way ANOVA with Sidak’s post hoc test ( $n = 3$ ). **(D)** Amplified cDNA of *Capn9* message normalized to *Gapdh* and **(E)** CAPN9 protein normalized to GAPDH following starvation with or without  $TGF\beta$  stimulation in the presence of the AKT2 inhibitor CCT128930 at indicated concentrations. **(F)** *Capn9* mRNA normalized to GAPDH following  $TGF\beta$  stimulation in MDCK cells. Data are expressed as mean  $\pm$  s.e.m.  $*P < 0.05$  by one-way ANOVA with Dunnett’s *post hoc* test. **(G)** Protein abundance of CAPN9 and phospho- $\beta$ -catenin in NMuMG cells 48 h after stimulation with WNT3a or  $TGF\beta$ .

**A**

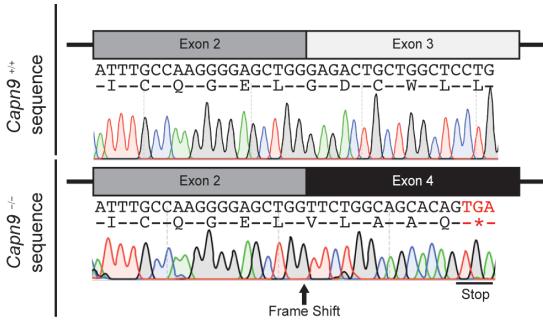

**B**

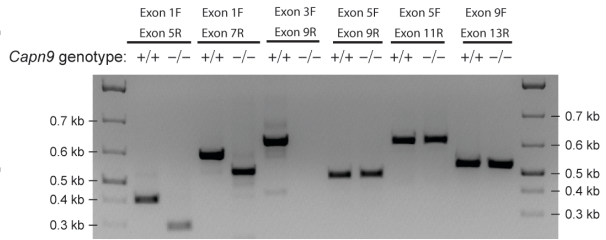

| Sense Primer | Antisense Primer | WT Amplicon | Knockout Amplicon |
|--------------|------------------|-------------|-------------------|
| Exon 1       | Exon 5           | 399         | 280               |
| Exon 1       | Exon 7           | 650         | 531               |
| Exon 3       | Exon 9           | 486         | No Amplification  |
| Exon 5       | Exon 11          | 718         | 718               |
| Exon 9       | Exon 11          | 539         | 539               |

**C**

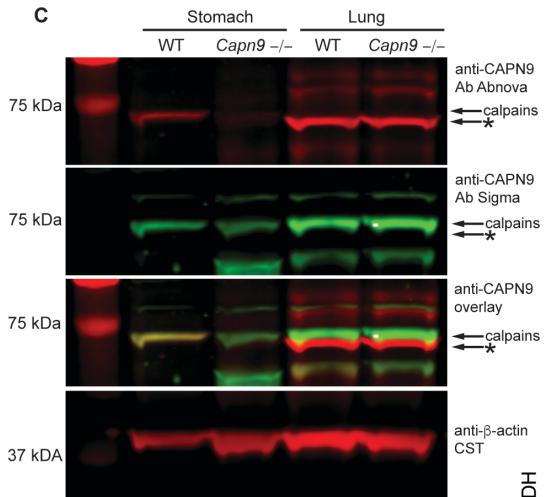

**D**

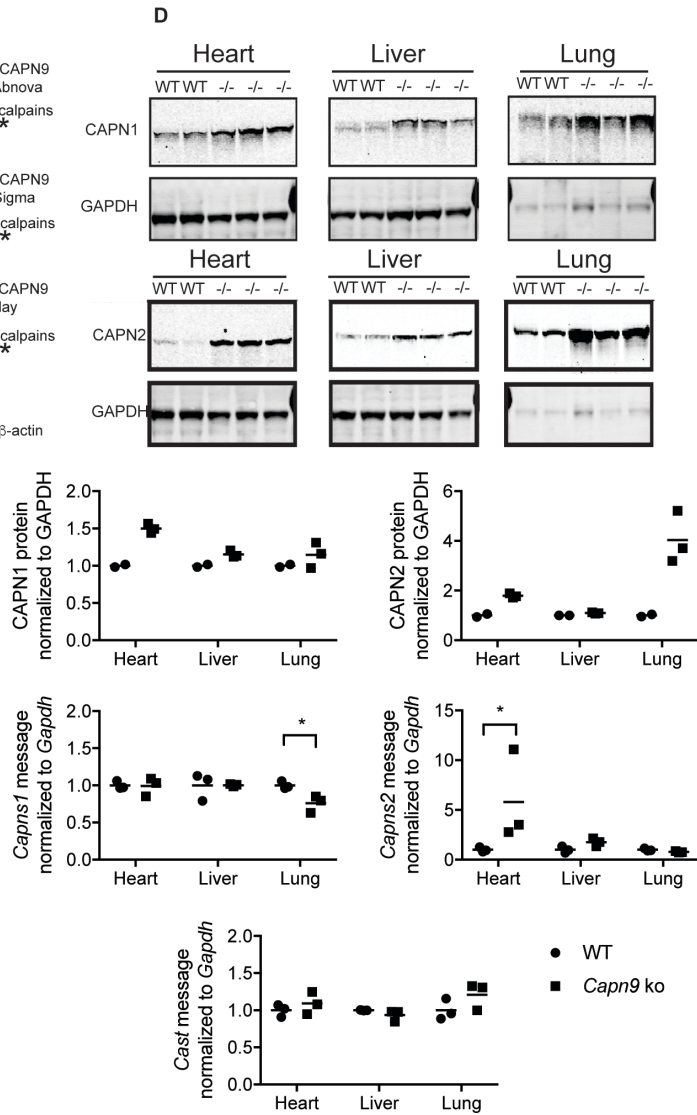



**Supplementary Fig. 6.** *Capn9*<sup>-/-</sup> mice expressed stable *Capn9* message that lack exon 3. **(A)**

Sanger sequencing of cDNA isolated from wildtype and *Capn9*<sup>-/-</sup> mice. Knockout amplicons show skipping of exon 3 and frame shift producing a stop codon (TGA) 6 triplet codons downstream of the exon-exon junction. **(B)** PCR amplification of cDNA isolated from the stomach of wildtype and *Capn9*<sup>-/-</sup> mice. Amplicons including exon 3 from *Capn9*-targeted mice are predicted to be 119 bp smaller than wildtype amplicons. PCR reactions with a primer complementary to exon 3 did not amplify. **(C)** Western blot analysis of CAPN9 protein expression in wildtype and *Capn9*<sup>-/-</sup> mouse stomach and lung. Antibodies to CAPN9 are Abnova clone 3A6 (H00010753-M02) and Sigma (HPA020398). Asterisk indicates a nonspecific band near the expected weight of CAPN9. **(D)** Protein expression of CAPN1 and CAPN2 in mouse heart, liver, and lung tissue in wildtype and *Capn9*<sup>-/-</sup> ( $n = 2, 3$  respectively). Messenger RNA expression of *Capns1/s2* and *Cast* in mouse heart, liver, and lung tissue ( $n = 3$ ). Data are expressed as mean \* $P < 0.05$  by one-way ANOVA with Sidak's *post hoc* test.

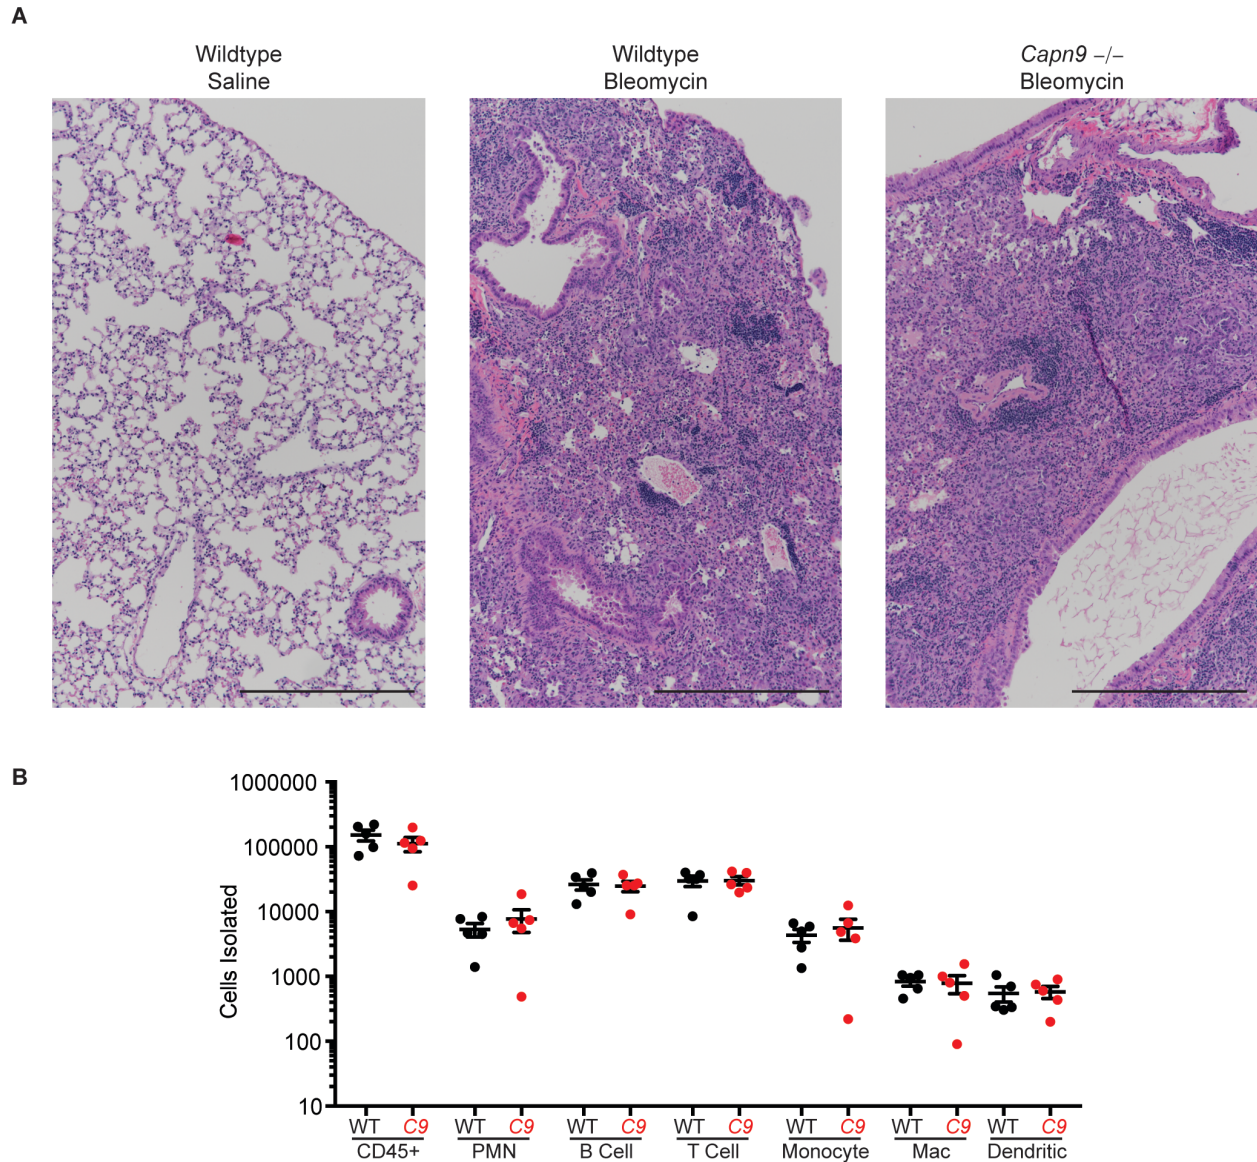

**Supplemental Fig. 7.** Bleomycin induced an equal inflammatory response in wildtype and *Capn9*<sup>-/-</sup> animals. (A) Representative lung H&E sections of mouse lung. Scale bar: 400  $\mu$ M. (B) Flow cytometry of right lung lobes from wildtype and *Capn9*<sup>-/-</sup> receiving bleomycin ( $n = 5$ ). Cells gated on live singlets, CD45+, PMN (neutrophils), B cells, T cells, macrophages and dendritic cells.
